# Supplementary material for: Monkeypox: A Histopathological and Transmission Electron Microscopy Study
Source: MDPI journal article supplement (doi:10.3390/microorganisms11071781), 2023-07-09
Supplement: s1 [file s1]

| Pat ID | Sex | Age | Ethnicity         | Sexual behavior | Unprotected sex | Travel history    | Other STIs           | Kind of lesions         | Number of skin lesions | Localization                                                | Systemic symptoms                              | Lymphadenopathy           | Hospitalization | Outcome |
|--------|-----|-----|-------------------|-----------------|-----------------|-------------------|----------------------|-------------------------|------------------------|-------------------------------------------------------------|------------------------------------------------|---------------------------|-----------------|---------|
| 1      | M   | 45  | Ukrainian         | MSM             | Yes             | No                | None                 | Pustular lesions        | >10                    | Genital region; lower limb; middle finger of the right hand | Fever; headache; asthenia                      | No                        | Yes             | CR      |
| 2      | M   | 34  | Caucasian (Italy) | MSM             | Yes             | Yes (Netherlands) | None                 | Pustular lesions        | >5                     | Penile shaft and glans                                      | Fever; headache; myalgia; arthralgia; asthenia | No                        | No              | CR      |
| 3      | M   | 42  | Caucasian (Italy) | MSM             | Yes             | Yes (Spain)       | None                 | Pustular lesions        | <5                     | Penile shaft and glans; pubic region; perioral region       | Asthenia                                       | Yes (laterocervical area) | No              | CR      |
| 4      | M   | 37  | Caucasian (Italy) | MSM             | Yes             | No                | Late-latent syphilis | Pseudo-pustular lesions | >10                    | Face; penile shaft; perianal region                         | Hyperpyrexia; rectal pain                      | No                        | No              | CR      |
| 5      | M   | 40  | Brazilian         | MSM             | Yes             | No                | None                 | Vesicopustular lesions  | >5                     | Pubic region; penile shaft; upper limb; palm of the hand    | Fever; headache; asthenia                      | No                        | No              | CR      |
| 6      | M   | 24  | Caucasian (Italy) | MSM             | Yes             | No                | Syphilis             | Ulcerate lesion         | 1                      | Pubic region                                                | Asthenia                                       | Yes (inguinal area)       | No              | CR      |

**Table S1: Clinical characteristics of patients with human monkeypox virus infection.**

MSM: men who have sex with men; CR: complete remission.
